# Supplementary material for: Radiosensitizing Pancreatic Cancer with PARP Inhibitor and Gemcitabine: An In Vivo and a Whole-Transcriptome Analysis after Proton or Photon Irradiation
Source: Cancers (Basel). 2021 Jan 30;13(3):527. doi: 10.3390/cancers13030527 (PMC7866541; doi:10.3390/cancers13030527)
Supplement: Supplementary file 1 [file cancers-13-00527-s001.pdf]

# Supplementary Materials: Radiosensitizing Pancreatic Cancer with PARP Inhibitor and Gemcitabine: An In Vivo and a Whole-Transcriptome Analysis after Proton or Photon Irradiation

Waisse Waissi, Anaïs Nicol, Matthieu Jung, Marc Rousseau, Delphine Jarret, Georges Noel and Hélène Burckel

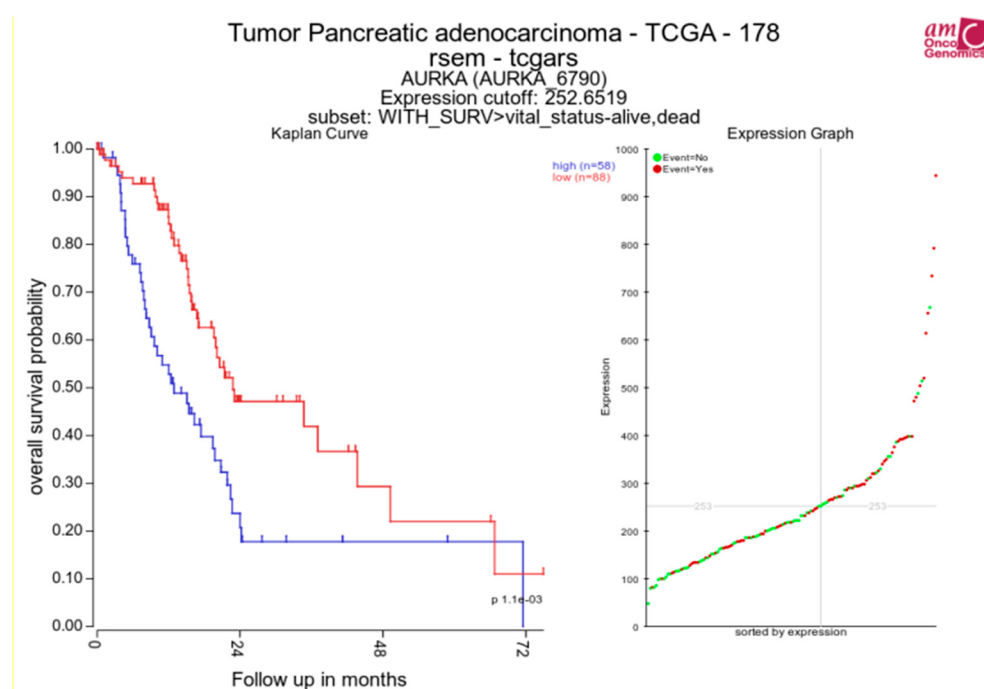

**Figure S1.** Kaplan-Meier curve analysis of overall survival according to *AURKA* expression based on TCGA RNA sequencing data extracted from Genomics Analysis and Visualization Platform (<http://r2.amc.nl>).

**Table S1.** Median progression-free survival (days) obtained for each condition observed until 50 days (photon) and 80 days (proton). DMSO (control); GEM: gemcitabine; OLA: olaparib; NI: not irradiated; NR: never reached.

| Irradiation  |           |            |
|--------------|-----------|------------|
| NI           | DMSO      | 19 (14–24) |
|              | GEM       | 19 (19–28) |
|              | OLA       | 14 (9–28)  |
|              | OLA + GEM | 23 (16–40) |
| 10 Gy Photon | DMSO      | 30 (23–NR) |
|              | GEM       | 37 (30–44) |

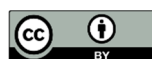

**Copyright:** © 2021 by the authors.  
Licensee MDPI, Basel, Switzerland.  
This article is an open access article distributed under the terms and conditions of the Creative Commons Attribution (CC BY) license (<http://creativecommons.org/licenses/by/4.0/>).

## Systemic Treatment

## Median 2 fold Change in Tumor Volume (Days)

|              |           |            |
|--------------|-----------|------------|
| 10 Gy Proton | OLA       | 35 (19–NR) |
|              | OLA + GEM | 47 (30–NR) |
|              | DMSO      | 40 (26–NR) |
|              | GEM       | 77 (44–NR) |
|              | OLA       | 75 (49–NR) |
|              | OLA + GEM | NR (80–NR) |
